# Supplementary material for: The Effects of Salinity on the Anatomy and Gene Expression Patterns in Leaflets of Tomato cv. Micro-Tom
Source: MDPI journal article supplement (doi:10.3390/genes12081165), 2021-07-29
Supplement: s1 [file s1]

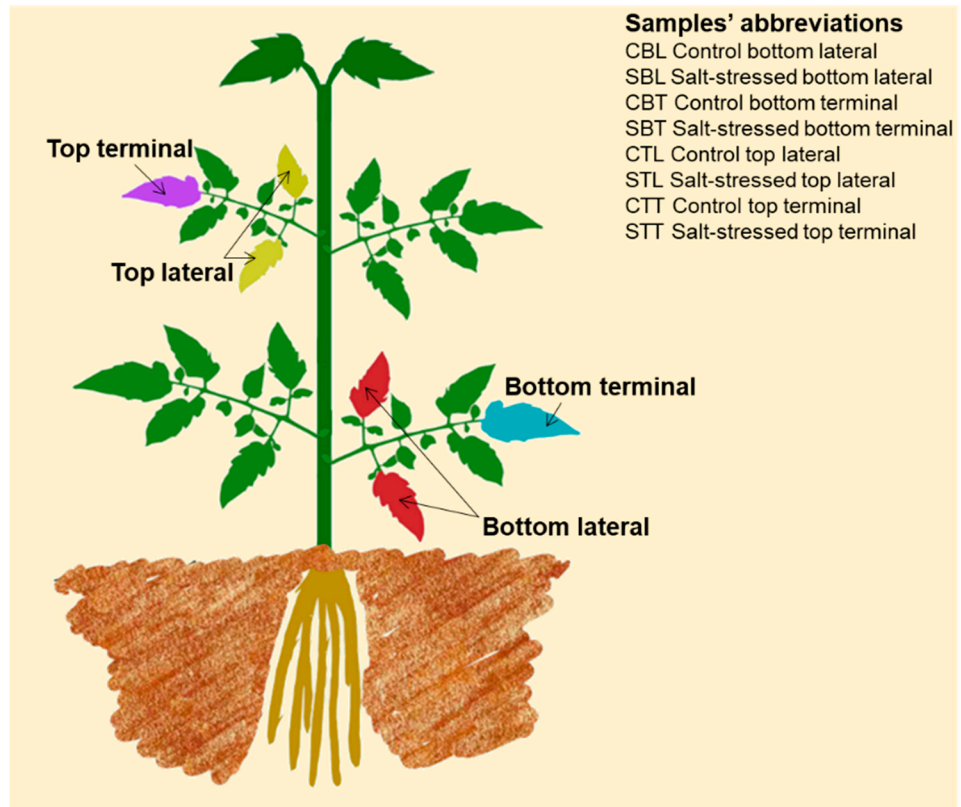

**Figure S1.** Schematic representation of the sampling procedure and samples' abbreviations used. The sampled leaflets are colored and indicated with arrows. Purple: top terminal leaflet, yellow: top lateral leaflets, aquamarine: bottom terminal leaflet, red: bottom lateral leaflets.

**Table S1.** List of primers used in the study with details of amplicons' size and amplification efficiency.

| Gene          | Solyc. code      | Primer<br>Fwd (5'→3')      | Primer<br>Rev (5'→3')  | Amplic.<br>size (bp) | Amplif.<br>efficiency |
|---------------|------------------|----------------------------|------------------------|----------------------|-----------------------|
| <i>4CL</i>    | Solyc12g094520.1 | CGTAGACCAATTCGGTTTCC       | GATTTTCCCGCTATGTGCTC   | 81                   | 1.90                  |
| <i>4CL3</i>   | Solyc03g097030.2 | TCATGTGGCTCTGTGATTCG       | CAGTGGCTTCATCGTCATTG   | 145                  | 1.92                  |
| <i>ANS</i>    | Solyc08g080040   | AAGTTGGAGGCATGGAAGAC       | GTTCTGGTTGGGGACATTG    | 72                   | 1.92                  |
| <i>AP2C</i>   | Solyc02g093150.2 | AAACGGAGACACTTGGCAAC       | ACGGCGGCTCTTCTTAATAG   | 86                   | 1.90                  |
| <i>AREB2</i>  | Solyc11g044560.1 | TGCAGAGACAGGGTCTTTG        | CTGCCCAAAGTTTGATCCTC   | 134                  | 1.92                  |
| <i>CHI1</i>   | Solyc05g052240   | GAAGAAGAGGAAGAAGCACTCG     | ATCTTGCCTCCAGAAGC      | 70                   | 1.93                  |
| <i>CHI2</i>   | Solyc05g010320   | GGAGTTGGAACATTCAGTCG       | CGTCAAGGGCAAGATCATAG   | 91                   | 1.90                  |
| <i>Cyclo</i>  | Solyc07g025390.2 | GCTAAGAACGCTGGACCTAATG     | TGGGTGTGCCTTTCTGAATG   | 183                  | 1.90                  |
| <i>ERFB1</i>  | Solyc05g052040.1 | GAATGATGACGGAATTGTAATGAAGA | TTCCACAATCCCAAATTGAAGA | 101                  | 1.93                  |
| <i>ERFD2</i>  | Solyc12g056590.1 | CATAAAGCCGCCAGAGTTTG       | TGACAATCTGGCGTTCTCAG   | 132                  | 2.00                  |
| <i>EXPA18</i> | Solyc06g076220.2 | GTGTGGAGCGTGTTTTGAG        | GTTTGGGAGAGCAAAGTTGG   | 119                  | 1.91                  |
| <i>EXPA4</i>  | Solyc09g010860.2 | GATGGCAAATGGTGTCTTCC       | CCGTCATCGTTTGGTAAAGC   | 92                   | 1.92                  |
| <i>EXPA5</i>  | Solyc02g088100.2 | CGCCCTCATTTTGATCTCTC       | AATTCCTCCGCTTCTTCTGC   | 111                  | 1.93                  |
| <i>FLA10</i>  | Solyc10g005960.1 | AACGGTGTGTTGTCCTGGAG       | CCCATGATACTCAAGCAACG   | 100                  | 1.92                  |
| <i>FLA11</i>  | Solyc11g069250.1 | CCTTCTGGTCCAACAAACATC      | CATCCCATCCCTTGATTG     | 138                  | 2.03                  |
| <i>FLA2</i>   | Solyc07g048090.1 | AGTCCCTTGCCTTTTCCAC        | ATAAGTTCCCTCCAGCCAAG   | 105                  | 1.99                  |
| <i>FPS</i>    | Solyc12g015860.1 | CATACACGCCGAGGTCAAA        | GCAGCAATCATGCCAACCTT   | 59                   | 1.91                  |

|              |                  |                           |                         |     |      |
|--------------|------------------|---------------------------|-------------------------|-----|------|
| <i>FUL1</i>  | Solyc06g069430.2 | GTTTTGCCACAACAACCTGGACTC  | CTTGCTGCTGTGAAGAACTACC  | 106 | 1.91 |
| <i>GPS</i>   | Solyc08g023470.2 | TGTGATGGGAAATAAGCTAGCTGTA | ACACATGCTCGGGAAAGCA     | 60  | 1.93 |
| <i>HQT</i>   | Solyc07g005760.2 | CCAATGGCTGGAAGATTAGG      | GCCTCAACAAACAAAACACC    | 83  | 1.90 |
| <i>HSF30</i> | Solyc08g062960.2 | CCTGACAGATGGGAATTTGC      | CAAGCACCAGATCCTTGTTG    | 119 | 1.90 |
| <i>IPI</i>   | Solyc04g056390.2 | TGTCCCAGTTGACCAGTTCATT    | TTCCCGTCAGATGGAGCTTT    | 63  | 1.98 |
| <i>LEA2</i>  | Solyc01g095140.2 | GGTCTCGCTATTGATCTTCCAG    | CTTCTTGTTTGTACCGTTCC    | 112 | 1.98 |
| <i>LEA3</i>  | Solyc01g095150.2 | AGGGACATTGGAGGAGATTG      | AGAGGGGAATGGTGATGTTG    | 94  | 1.96 |
| <i>LEA7</i>  | Solyc02g084840.2 | AAATTGCCAGGAGGTCACAG      | AGTGCCTTCCATGCCATAAC    | 81  | 2.00 |
| <i>LEA15</i> | Solyc08g015690.2 | GGGCTTCATCCAGGATATTG      | GGGTTTGGGTTCCTCACAAG    | 146 | 1.94 |
| <i>LOXA</i>  | Solyc08g014000.2 | GGCTGAAATGGAAACACCAC      | GGATACTGCCCCGAAATTGAC   | 99  | 1.97 |
| <i>LOXB</i>  | Solyc01g099190.2 | GTCTTTGGGTGGAATTGTGG      | GCCATCAACAACCTGAAGCAC   | 127 | 1.92 |
| <i>LOXD</i>  | Solyc03g122340.2 | GCTTCAGGTTTTTCCACCAG      | GCATCCAAAGCCTCTTGAAC    | 126 | 1.93 |
| <i>PAL2</i>  | Solyc05g056170.2 | AGTGATTGGGTGATGGAAGG      | TTTTGTAGGGCTGCACCTTG    | 110 | 1.91 |
| <i>PAL6</i>  | Solyc10g086180.1 | TGAGACGTTGAATGCTGAGG      | AGCCAAACCAGAACCAACAG    | 121 | 1.89 |
| <i>SAND</i>  | Solyc03g115810.2 | GATTCAAGGGTCTGTTTGC       | TCATCAGGGTGAAGAGATGC    | 89  | 2.01 |
| <i>SOD1</i>  | Solyc01g067740.2 | AACCTGGACTTCATGGCTTC      | CCAGCAGGATTGTAATGTGG    | 88  | 1.98 |
| <i>SOD2</i>  | Solyc03g062890.2 | GCAATCCAATGGTGTTACCC      | AGTGGAATTGCAGCCGTTAG    | 112 | 1.96 |
| <i>SOD3</i>  | Solyc11g066390.1 | CTCCTGGAGATGAAATCCGT      | AAGTGCTCGTCCAACAACCTG   | 134 | 1.90 |
| <i>SOS1</i>  | Solyc01g005020.2 | AAGGAAAGCGAGGAAGAAGG      | TCGGAGAACCTGAGGAAATG    | 78  | 1.90 |
| <i>SOS2</i>  | Solyc12g009570.1 | CAAGAATTGAGGGGGTAACG      | AAAAGGGAAGGGGCTACTTG    | 82  | 1.90 |
| <i>TAS14</i> | Solyc02g084850.2 | CGGCAATCAAGACCAAATG       | TCCATATTCTCCACCAGTGC    | 145 | 1.93 |
| <i>TPS</i>   | Solyc12g006570.1 | CAACTCCCAACTTGCACAACA     | CCCTCACAATGCCATCTTTAATT | 68  | 1.93 |
| <i>XETB1</i> | Solyc12g017240.1 | GCAGCAGCTATCTGTTCTTGC     | AGGTAACCGTTGCATCTTGG    | 83  | 1.93 |
| <i>XETB2</i> | Solyc07g056000.2 | GTTCAACAACCACGAAGCAC      | TGTGTAGCCCAATCATCAGC    | 96  | 1.89 |
| <i>XTH14</i> | Solyc09g008320.2 | AATCTCTGGGTCCTAATCACC     | CCACTGCCTGAATTTCTATCAAG | 77  | 1.91 |
| <i>XTH16</i> | Solyc07g052980.2 | GCTTGTTGAAGGTGACTCTGC     | ATTGTGGGTGGTCCATCTG     | 70  | 1.92 |
| <i>XTH2</i>  | Solyc07g009380.2 | CGAAAACGGGCAACTTCTTA      | CTGACCCCCACCGAAGATAAA   | 164 | 1.92 |
| <i>XTH20</i> | Solyc07g006870.2 | GCACTGTCACCGCATACTATTTG   | GCTCTCTATCACCTTTGCCTTG  | 138 | 2.08 |
| <i>XTH4</i>  | Solyc11g065600.1 | TGATGTGCCTTTTTGGAACA      | AGCAGTGACAACACCAGCAG    | 199 | 1.91 |
| <i>XTH5</i>  | Solyc01g081060.2 | GTGCGAGATTGATCCAGTTG      | GATGACGATGTCCGTGGTG     | 86  | 1.96 |
| <i>XTH6</i>  | Solyc11g066270.1 | CCCCTTCACCTGGCTACTATC     | TGATGTTGAGGACCCCAAAG    | 88  | 1.91 |
| <i>XTH7</i>  | Solyc02g091920.2 | ATGTCCACGGAAAAGGTGAC      | GAGAACACGGCTTGATGATG    | 109 | 1.91 |
| <i>XTH8</i>  | Solyc04g008210.1 | CCTTCATGGCTTATTCAGTGC     | AAATGCAACCACCACTCCAG    | 70  | 1.92 |

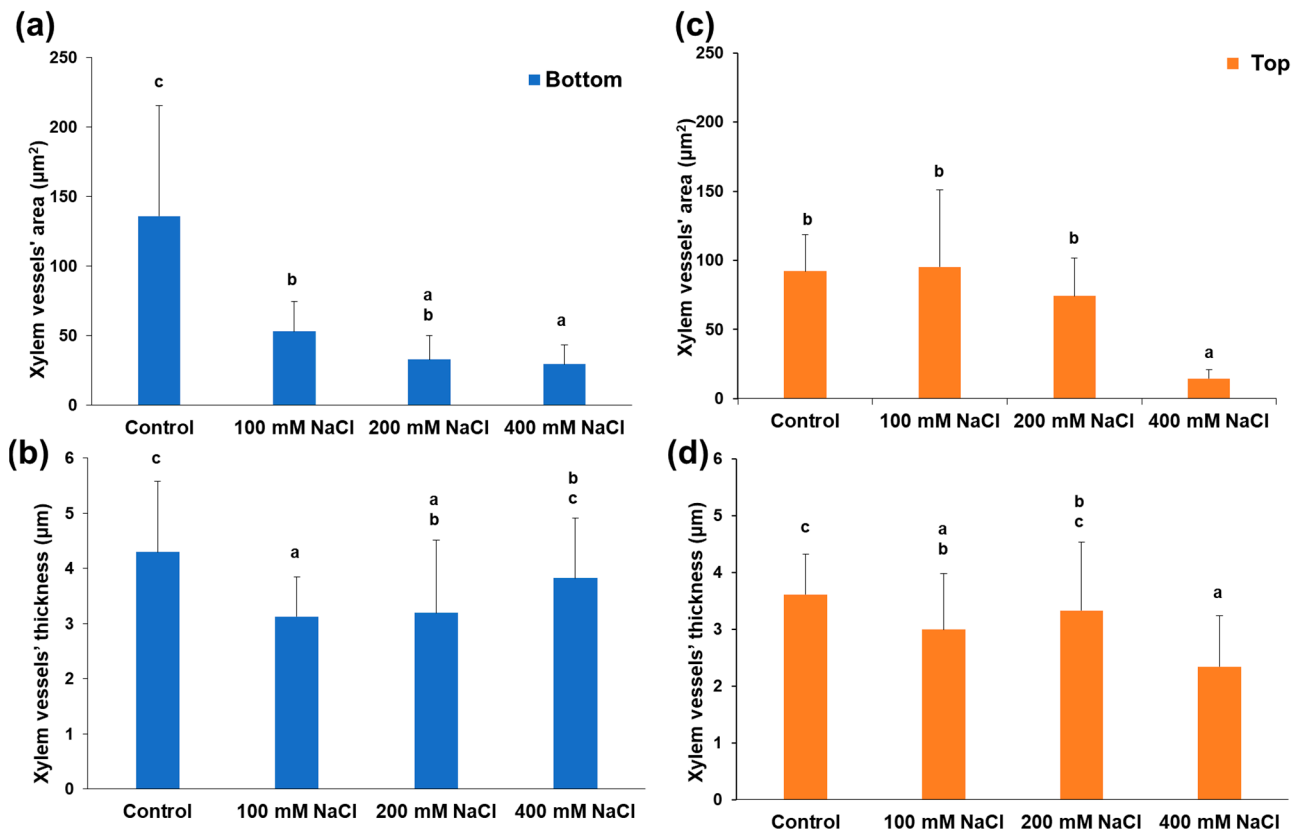

**Figure S2.** Measures of the xylem vessels' (a-b) area and thickness (c-d) in bottom and top leaflets. Bottom area [ $F(3,52)=21.94$ ,  $p$ -value=0.000]; Top area [ $X^2(3)=23.24$ ,  $p$ -value=0.000]; Bottom thickness [ $F(3,124)=8.46$ ,  $p$ -value=0.000]; Top thickness [ $X^2(3)=17.46$ ,  $p$ -value = 0.000]. A compact letter display [26] is used to indicate the significance between groups of samples.

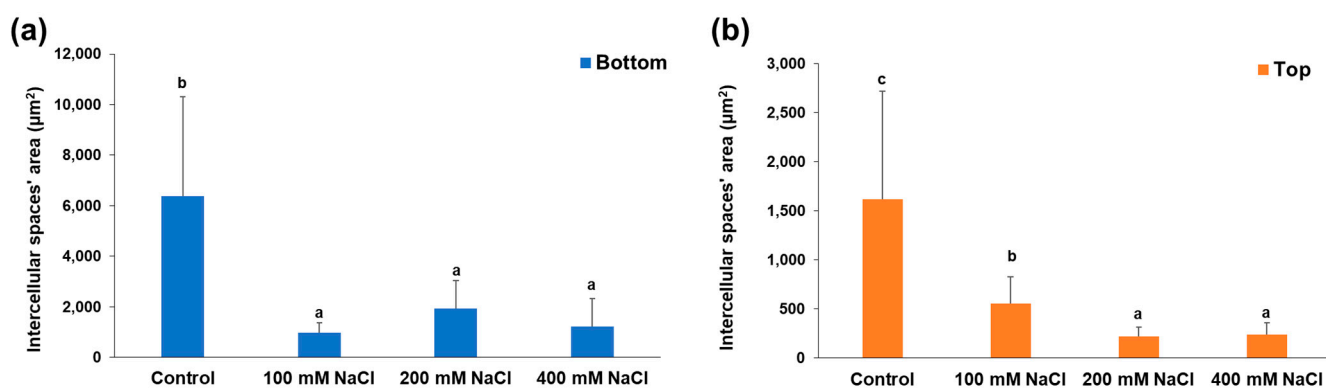

**Figure S3.** Measures of the intercellular spaces in the spongy parenchyma of bottom (a-d) bottom and top leaflets (e-h). Bottom intercellular spaces [ $X^2(3)=15.42$ ,  $p$ -value=0.001]; Top intercellular spaces [ $F(3,35)=22.36$ ,  $p$ -value=0.000]. A compact letter display [26] is used to indicate the significance between groups of samples.

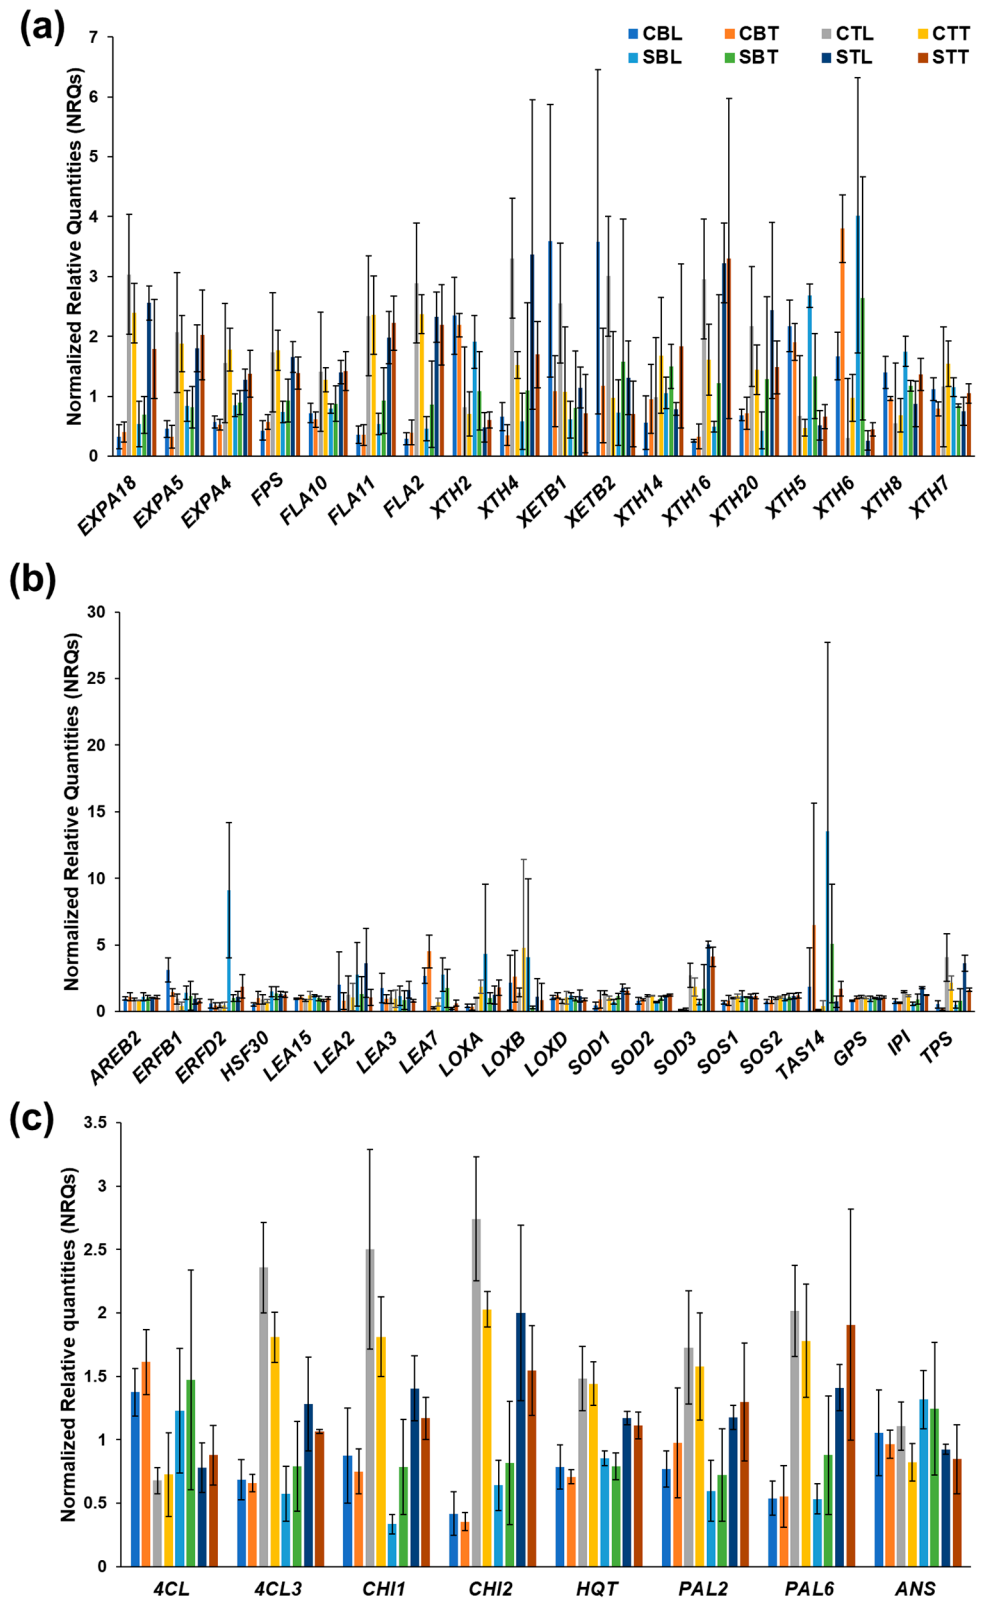

**Figure S4.** Graph of the expression data shown in Figure 7a. The values are normalized relative quantities (NRQs)  $\pm$  standard deviation ( $n=3$ ). The statistical significance is provided in Table S2. CBL/SBL= control/salt-stressed bottom lateral leaflet; CBT/SBT= control/salt-stressed bottom terminal leaflet; CTL/STL= control/salt-stressed top lateral leaflet; CTT/STT= control/salt-stressed top terminal leaflet.

**Table S2.** Statistical significance of the expression data shown in Figure S2. The character in italics refer to the letters assigned with the non-parametric test (Kruskal-Wallis followed by Dunn's post-hoc test), while the others indicate those assigned with the parametric test (one-way ANOVA followed by Tukey's post-hoc test). A compact letter display [26] is used to indicate the significance between groups of samples.

|               | CBL       | CBT        | CTL        | CTT         | SBL        | SBT         | STL        | STT        |
|---------------|-----------|------------|------------|-------------|------------|-------------|------------|------------|
| <i>4CL3</i>   | <i>a</i>  | <i>a</i>   | <i>b</i>   | <i>b</i>    | <i>a</i>   | <i>a</i>    | <i>ab</i>  | <i>ab</i>  |
| <i>CHI1</i>   | bc        | ab         | d          | cd          | a          | ab          | bcd        | bcd        |
| <i>FLA11</i>  | a         | a          | b          | b           | a          | ab          | b          | b          |
| <i>FLA2</i>   | <i>a</i>  | <i>ab</i>  | <i>d</i>   | <i>cd</i>   | <i>abc</i> | <i>abc</i>  | <i>cd</i>  | <i>bcd</i> |
| <i>EXPA5</i>  | a         | a          | b          | b           | ab         | ab          | b          | b          |
| <i>PAL6</i>   | a         | a          | b          | b           | a          | ab          | b          | b          |
| <i>CHI2</i>   | <i>a</i>  | <i>a</i>   | <i>c</i>   | <i>bc</i>   | <i>ab</i>  | <i>ab</i>   | <i>bc</i>  | <i>abc</i> |
| <i>EXPA18</i> | <i>a</i>  | <i>a</i>   | <i>b</i>   | <i>b</i>    | <i>a</i>   | <i>a</i>    | <i>b</i>   | <i>ab</i>  |
| <i>TPS</i>    | <i>ab</i> | <i>a</i>   | <i>c</i>   | <i>bc</i>   | <i>ab</i>  | <i>ab</i>   | <i>c</i>   | <i>abc</i> |
| <i>XTH4</i>   | <i>a</i>  | <i>a</i>   | <i>b</i>   | <i>ab</i>   | <i>a</i>   | <i>ab</i>   | <i>b</i>   | <i>ab</i>  |
| <i>EXPA4</i>  | a         | a          | c          | c           | ab         | ab          | bc         | bc         |
| <i>FPS</i>    | a         | ab         | d          | d           | abc        | bcd         | d          | cd         |
| <i>FLA10</i>  | a         | a          | c          | bc          | ab         | abc         | c          | c          |
| <i>SOD2</i>   | <i>ab</i> | <i>abc</i> | <i>cd</i>  | <i>d</i>    | <i>a</i>   | <i>abcd</i> | <i>bcd</i> | <i>c</i>   |
| <i>HQT</i>    | ab        | a          | d          | d           | abc        | ab          | cd         | bcd        |
| <i>PAL2</i>   | abc       | abc        | c          | bc          | a          | ab          | abc        | abc        |
| <i>SOD1</i>   | <i>a</i>  | <i>abc</i> | <i>bcd</i> | <i>abc</i>  | <i>ab</i>  | <i>abcd</i> | <i>d</i>   | <i>cd</i>  |
| <i>IP1</i>    | <i>ab</i> | <i>ab</i>  | <i>cd</i>  | <i>abcd</i> | <i>a</i>   | <i>abc</i>  | <i>d</i>   | <i>bcd</i> |
| <i>XTH20</i>  | <i>ab</i> | <i>ab</i>  | <i>c</i>   | <i>abc</i>  | <i>a</i>   | <i>abc</i>  | <i>bc</i>  | <i>abc</i> |
| <i>SOD3</i>   | <i>a</i>  | <i>ab</i>  | <i>bcd</i> | <i>abcd</i> | <i>abc</i> | <i>abcd</i> | <i>d</i>   | <i>cd</i>  |
| <i>XTH16</i>  | <i>a</i>  | <i>a</i>   | <i>b</i>   | <i>ab</i>   | <i>ab</i>  | <i>ab</i>   | <i>b</i>   | <i>b</i>   |
| <i>ANS</i>    | <i>a</i>  | <i>a</i>   | <i>a</i>   | <i>a</i>    | <i>a</i>   | <i>a</i>    | <i>a</i>   | <i>a</i>   |
| <i>AREB2</i>  | a         | a          | a          | a           | a          | a           | a          | a          |
| <i>LOXD</i>   | a         | a          | a          | a           | a          | a           | a          | a          |
| <i>LEA15</i>  | <i>ab</i> | <i>bc</i>  | <i>a</i>   | <i>bc</i>   | <i>c</i>   | <i>abc</i>  | <i>a</i>   | <i>abc</i> |
| <i>GPS</i>    | <i>a</i>  | <i>a</i>   | <i>a</i>   | <i>a</i>    | <i>a</i>   | <i>a</i>    | <i>a</i>   | <i>a</i>   |
| <i>SOS1</i>   | a         | a          | a          | a           | a          | a           | a          | a          |
| <i>SOS2</i>   | a         | a          | a          | a           | a          | a           | a          | a          |
| <i>XTH7</i>   | a         | a          | a          | a           | a          | a           | a          | a          |
| <i>HSF30</i>  | a         | ab         | ab         | ab          | b          | b           | b          | ab         |
| <i>XTH14</i>  | a         | a          | a          | a           | a          | a           | a          | a          |
| <i>LOXB</i>   | <i>a</i>  | <i>a</i>   | <i>a</i>   | <i>a</i>    | <i>a</i>   | <i>a</i>    | <i>a</i>   | <i>a</i>   |
| <i>LEA2</i>   | a         | a          | a          | a           | a          | a           | a          | a          |
| <i>LEA3</i>   | a         | a          | a          | a           | a          | a           | a          | a          |
| <i>4CL</i>    | a         | a          | a          | a           | a          | a           | a          | a          |
| <i>XTH8</i>   | bc        | abc        | a          | ab          | c          | bc          | abc        | bc         |
| <i>ERFB1</i>  | b         | b          | ab         | a           | ab         | ab          | ab         | ab         |
| <i>XTH2</i>   | c         | bc         | abc        | abc         | bc         | abc         | a          | ab         |
| <i>XTH5</i>   | <i>bc</i> | <i>abc</i> | <i>a</i>   | <i>a</i>    | <i>c</i>   | <i>abc</i>  | <i>a</i>   | <i>ab</i>  |
| <i>XETB1</i>  | <i>a</i>  | <i>a</i>   | <i>a</i>   | <i>a</i>    | <i>a</i>   | <i>a</i>    | <i>a</i>   | <i>a</i>   |
| <i>XETB2</i>  | a         | a          | a          | a           | a          | a           | a          | a          |
| <i>ERFD2</i>  | <i>a</i>  | <i>a</i>   | <i>a</i>   | <i>a</i>    | <i>a</i>   | <i>a</i>    | <i>a</i>   | <i>a</i>   |
| <i>LEA7</i>   | c         | c          | a          | ab          | c          | bc          | a          | ab         |

|                     |                   |                  |                  |                   |                  |                   |                   |                  |
|---------------------|-------------------|------------------|------------------|-------------------|------------------|-------------------|-------------------|------------------|
| <b><i>XTH6</i></b>  | <b><i>abc</i></b> | <b><i>c</i></b>  | <b><i>ab</i></b> | <b><i>abc</i></b> | <b><i>bc</i></b> | <b><i>bc</i></b>  | <b><i>a</i></b>   | <b><i>ab</i></b> |
| <b><i>LOXA</i></b>  | <b><i>a</i></b>   | <b><i>a</i></b>  | <b><i>ab</i></b> | <b><i>bc</i></b>  | <b><i>bc</i></b> | <b><i>abc</i></b> | <b><i>abc</i></b> | <b><i>c</i></b>  |
| <b><i>TAS14</i></b> | <b><i>ab</i></b>  | <b><i>ab</i></b> | <b><i>a</i></b>  | <b><i>ab</i></b>  | <b><i>b</i></b>  | <b><i>ab</i></b>  | <b><i>ab</i></b>  | <b><i>ab</i></b> |

*4CL* [F(7,16)=3.13, *p*-value=0.028], *AREB2* [F(7,16)=0.79, *p*-value=0.605], *CHI1* [F(7,16)=12.58, *p*-value=0.000], *ERFB1* [F(7,16)=4.63, *p*-value=0.005], *EXPA5* [F(7,16)=12.74, *p*-value=0.000], *EXPA4* [F(7,16)=15.47, *p*-value=0.000], *FDS* [F(7,16)=14.64, *p*-value=0.000], *FLA10* [F(7,16)=9.94, *p*-value=0.000], *FLA11* [F(7,16)=13.53, *p*-value=0.000], *HQT* [F(7,16)=14.45, *p*-value=0.000], *HSF30* [F(7,16)=3.79, *p*-value=0.013], *LEA2* [F(7,16)=0.53, *p*-value=0.802], *LEA3* [F(7,16)=0.88 *p*-value=0.542], *LEA7* [F(7,16)=15.59, *p*-value=0.000], *LOXD* [F(7,16)=0.96, *p*-value=0.493], *PAL2* [F(7,16)=4.42, *p*-value=0.007], *PAL6* [F(7,16)=9.75, *p*-value=0.000], *SOS1* [F(7,16)=2.50, *p*-value=0.061], *SOS2* [F(7,16)=2.09, *p*-value=0.105], *TAS14* [F(7,16)=3.52, *p*-value=0.018], *XTH2* [F(7,16)=5.88, *p*-value=0.002], *XETB2* [F(7,16)=1.33, *p*-value=0.299], *XTH14* [F(7,16)=1.99, *p*-value=0.119], *XTH8* [F(7,16)=6.38, *p*-value=0.001], *XTH7* [F(7,16)=2.31, *p*-value=0.078], *4CL3* [X<sup>2</sup>(7)=18.49, *p*-value=0.010], *ANS* [X<sup>2</sup>(7)=8.71, *p*-value=0.274], *CHI2* [X<sup>2</sup>(7)=20.03, *p*-value=0.006], *ERFD2* [X<sup>2</sup>(7)=10.88, *p*-value=0.144], *EXPA18* [X<sup>2</sup>(7)=20.17, *p*-value=0.005], *FLA2* [X<sup>2</sup>(7)=19.16, *p*-value=0.008], *GPS* [X<sup>2</sup>(7)=8.57, *p*-value=0.285], *IPI* [X<sup>2</sup>(7)=19.53, *p*-value=0.007], *LEA15* [X<sup>2</sup>(7)=15.37, *p*-value=0.032], *LOXA* [X<sup>2</sup>(7)=17.13, *p*-value=0.017], *LOXB* [X<sup>2</sup>(7)=6.97, *p*-value=0.432], *SOD1* [X<sup>2</sup>(7)=17.08, *p*-value=0.017], *SOD2* [X<sup>2</sup>(7)=19.09, *p*-value=0.008], *SOD3* [X<sup>2</sup>(7)=20.47, *p*-value=0.005], *TPS* [X<sup>2</sup>(7)=20.03, *p*-value=0.006], *XTH4* [X<sup>2</sup>(7)=15.00, *p*-value=0.036], *XETB1* [X<sup>2</sup>(7)=12.41, *p*-value=0.088], *XTH16* [X<sup>2</sup>(7)=17.19, *p*-value=0.016], *XTH20* [X<sup>2</sup>(7)=14.23, *p*-value=0.047], *XTH5* [X<sup>2</sup>(7)=17.99, *p*-value=0.012], *XTH6* [X<sup>2</sup>(7)=17.41, *p*-value=0.015].
